# Supplementary material
Source: PubMed Central journal article supplement (PMC2528087)
Supplement: pp.108.120006_2.pdf [file pp.108.120006_2.pdf]

Fig S2

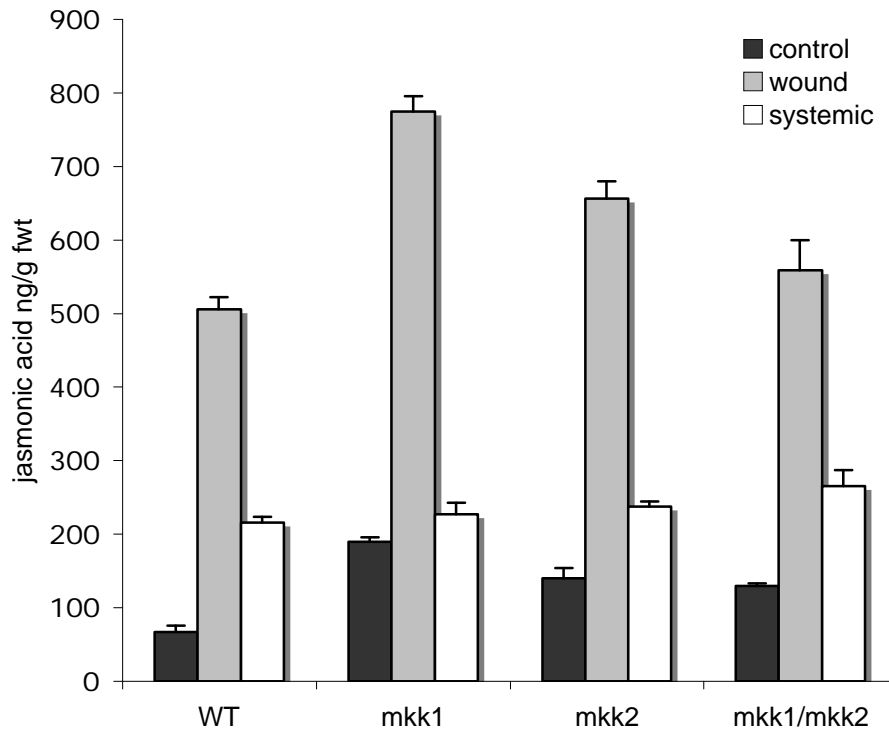

Figure S2, Jasmonic acid content of wild type, *mkk1*, *mkk2* and *mkk1/2* in control, local, and systemic leaves 2 hours after wounding.
